# Supplementary material for: Bamboo derived activated carbon as a highly efficient catalyst for the oxidation and adsorption of hydrogen sulfide at room temperature
Source: Royal Society of Chemistry journal article supplement (doi:10.1039/d3en00193h), 2023-01-01
Supplement: d3en00193h1.pdf [file d3en00193h1.pdf]

Supporting information for  
**Bamboo derived activated carbon as highly efficient catalysts for  
the oxidation and adsorption of hydrogen sulfide at room  
temperature**

Shi Du<sup>1,3</sup>, Xin Liu<sup>3</sup>, Yue Liu<sup>4</sup>, Junhao Wang<sup>1</sup>, Dongxu Liu<sup>1</sup>, Jianxiao Yang<sup>4\*</sup>, Xin  
Zhang<sup>1,2\*</sup>

<sup>1</sup> *College of Resources and Environment, University of Chinese Academy of Sciences,  
Beijing, 101408, China*

<sup>2</sup> *Yanshan Earth Critical Zone and Surface Fluxes Research Station, University of  
Chinese Academy of Sciences, Beijing, 101408, China*

<sup>3</sup> *Department of Environmental Engineering, College of Biology and the  
Environment, Nanjing Forestry University, Nanjing 210037, P. R. China*

<sup>4</sup> *Hunan Province Key Laboratory for Advanced Carbon Materials and Applied  
Technology, College of Materials Science and Engineering, Hunan University,  
Changsha, 410082, China.*

\*Corresponding author:

Prof. Xin Zhang: Tel.: +86-10-69672964

E-mail: [xzhang@ucas.ac.cn](mailto:xzhang@ucas.ac.cn)

Prof. Jianxiao Yang: Tel.: +86-731-88822733

E-mail: [yangjianxiao@hnu.edu.cn](mailto:yangjianxiao@hnu.edu.cn)

**Captions:**

**Text S1.** The equations of Yoon and Nelson model, Diffusion model and Adsorption kinetics models.

**Table S1** The parameters of different models of Na/BAC catalysts

**Fig. S1.** SEM image of Na/BAC-8.

**Fig. S2.** XRD patterns of Na/BAC catalysts.

**Fig. S3.** EDS mapping of Na/BAC-8.

**Fig. S4** Raman spectra of Na/BAC catalysts.

**Fig. S5.** Contact angle image of (a) Na/BAC-2, (b) Na/BAC-4, (c) Na/BAC-6, (d) Na/BAC-8.

**Fig. S6.** EDS mapping of spent Na/BAC-8 catalyst.

**Fig. S7** S 2p XPS spectra of spent Na/BAC catalyst.

**Fig. S8.** Sulfur K-edge XANES spectrum of spent Na/BAC-8 catalyst.

**Fig. S9.** IR spectra at different temperature (a) Na/BAC-2, (c) Na/BAC-4, (e) Na/BAC-6, (g) Na/BAC-8 and MS profiles (b) Na/BAC-2, (d) Na/BAC-4, (f) Na/BAC-6, (h) Na/BAC-8 of spent Na/BAC catalysts.

**Fig.S10.** Y-N models (a), IPD models (b), LDF models (c), PFO models (d) and PSO models (e) fitting of Na/BAC catalyst

**Fig. S11.** The O1s XPS spectra of Na/BAC-8 catalyst (a) and spent Na/BAC-8 catalyst (b).

**Fig. S12** Energy profile of H<sub>2</sub>S catalytic oxidation-adsorption at room temperature.

**Fig. S13.** The optimized geometries of the intermediates and transition states.

**Text S1. The equations of Yoon and Nelson model, Diffusion model and Adsorption kinetics models.**

**The Yoon and Nelson model (Y-N) can be expressed as following:**

$$\frac{C_0}{C_i} = \frac{1}{1 + \exp[k'(t_0 - t)]}$$

Where the outlet and inlet concentrations of the stream are marked as  $C_0$  and  $C_i$ , respectively. While  $t_0$  is the time for 50% adsorbate breakthrough (min), and  $k'$  is a rate constant ( $\text{min}^{-1}$ ).

**The Pseudo first order kinetic model (PFO) can be expressed as following:**

$$q_t = q_e(1 - e^{-k_1 t})$$

Where  $k_1$  ( $\text{min}^{-1}$ ) is the kinetic constant of PFO adsorption,  $q_e$  (mg/g) and  $q_t$  (mg/g) are the amount of D4 adsorption at equilibrium and at time  $t$  (min), respectively.

**The Pseudo second order kinetic model (PSO) can be expressed as following:**

$$q_t = \frac{q_e t}{t + \frac{1}{q_e k_2}}$$

Where  $k_2$  ( $\text{min}^{-1}$ ) is the kinetic constant of PSO adsorption,  $q_e$  (mg/g) and  $q_t$  (mg/g) have the same meaning as before.

**The Intra-particle diffusion model (IPD) can be expressed as following:**

$$q_e = k_{id} t^{0.5} + \theta$$

Where  $k_{id}$  ( $\text{mg/g} \cdot \text{min}^{-0.5}$ ) is the intra-particle-diffusion rate constant,  $\theta$  (mg/g) is a constant related to the thickness of the boundary layer.

**The Linear driving force model (LDF) can be expressed as following:**

$$\frac{M_t}{M_e} = 1 - e^{-kt}$$

Where  $M_t$  (mg/g) is the adsorption capacity at time  $t$ ;  $M_e$  (mg/g) is the equilibrium adsorption capacity of a given pressure increment, and  $k$  ( $\text{min}^{-1}$ ) is the rate constant.

**TableS1** The parameters of different models of Na/BAC catalysts

| Model                             | Parameter                                                                  | Na/BAC-2 | Na/BAC-4 | Na/BAC-6 | Na/BAC-8 |
|-----------------------------------|----------------------------------------------------------------------------|----------|----------|----------|----------|
| Pseudo first order<br>(PFO)       | $Q_e$ (g $\text{H}_2\text{S}$ · g cat <sup>-1</sup> )                      | 0.154    | 0.348    | 0.565    | 0.791    |
|                                   | $k_1$ ( $\text{min}^{-1}$ )                                                | 0.002    | 0.002    | 0.001    | 0.0006   |
|                                   | $R^2$                                                                      | 0.995    | 0.978    | 0.983    | 0.994    |
| Pseudo Second<br>Order (PSO)      | $Q_e$ (g $\text{H}_2\text{S}$ · g cat <sup>-1</sup> )                      | 0.154    | 0.354    | 0.572    | 0.793    |
|                                   | $k_2$ ( $\text{g} \cdot \text{g}^{-1} \cdot \text{min}^{-1}$ )             | 0.0019   | 0.002    | 0.0007   | 0.0001   |
|                                   | $R^2$                                                                      | 0.984    | 0.963    | 0.970    | 0.974    |
| Intra-particle<br>diffusion (IPD) | $k_{\text{IP}}$ ( $\text{g} \cdot \text{g}^{-1} \cdot \text{min}^{-0.5}$ ) | 0.0076   | 0.009    | 0.013    | 0.005    |
|                                   | $C$ ( $\text{g} \cdot \text{g}^{-1}$ )                                     | -0.017   | -0.022   | -0.042   | -0.008   |
|                                   | $R^2$                                                                      | 0.957    | 0.956    | 0.954    | 0.963    |
| Linear driving<br>force (LDF)     | $k$                                                                        | 0.009    | 0.004    | 0.003    | 0.002    |
|                                   | $R_2$                                                                      | 0.928    | 0.933    | 0.936    | 0.926    |
| Yoon and Nelson<br>model (Y-N)    | $k$                                                                        | 0.046    | 0.016    | 0.015    | 0.011    |
|                                   | $R_2$                                                                      | 0.908    | 0.980    | 0.953    | 0.993    |

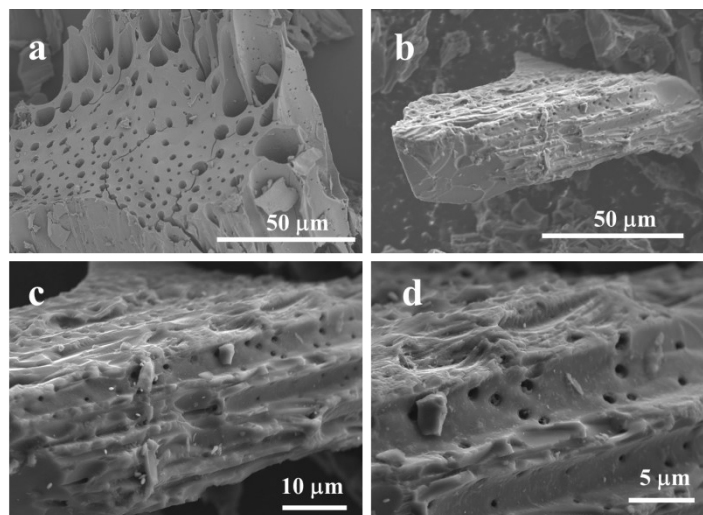

Fig.S1 SEM image of Na/BAC-8

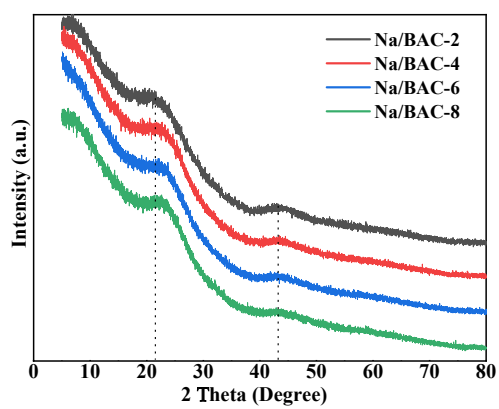

Fig.S2 XRD patterns of Na/BAC catalysts

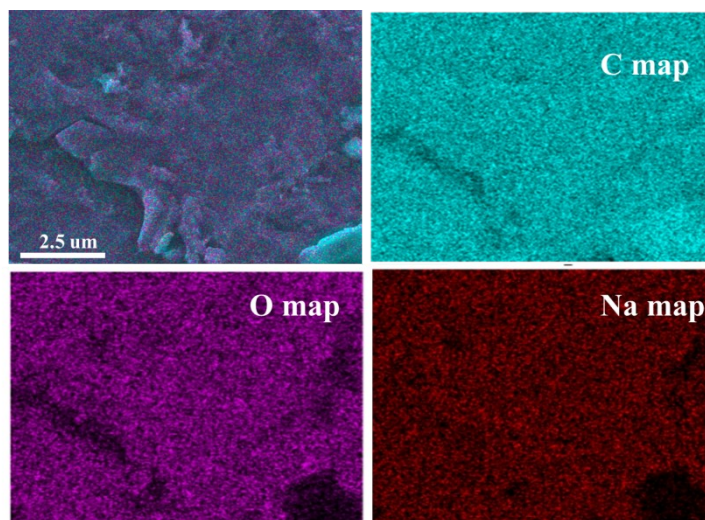

Fig.S3 EDS mapping of Na/BAC-8

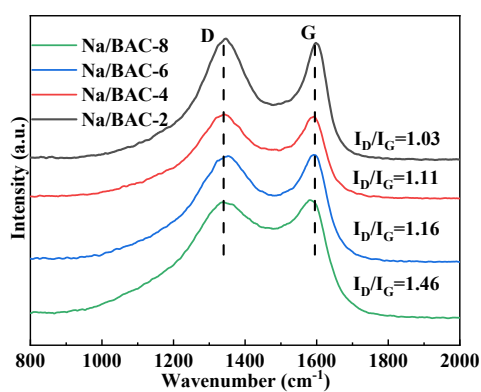

Fig.S4 Raman spectra of Na/BAC catalysts

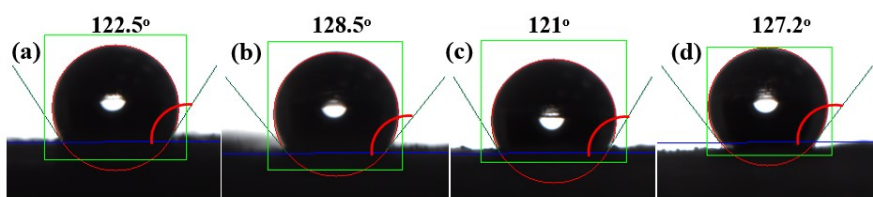

Fig.S5 contact angle image of (a) Na/BAC-2 (b) Na/BAC-4(c) Na/BAC-6 (d)

Na/BAC-8

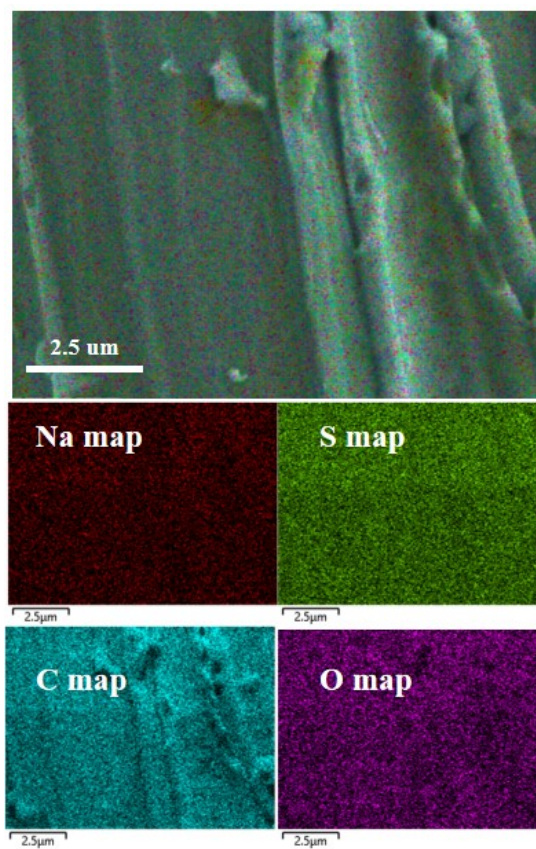

Fig.S6 EDS mapping of spent Na/BAC-8 catalyst



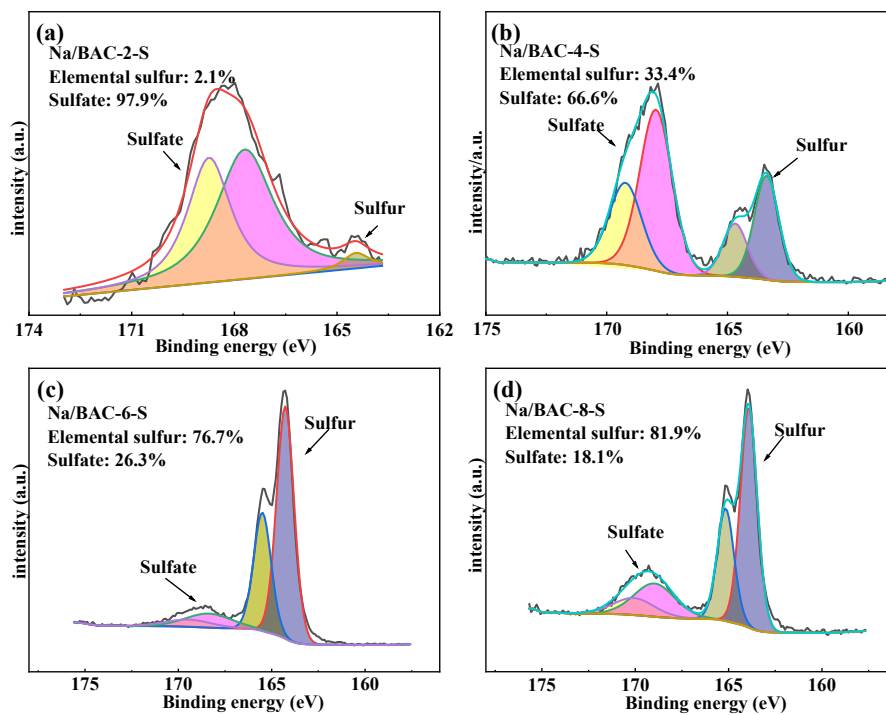

Fig. S7 S 2p XPS spectra of spent Na/BAC catalyst

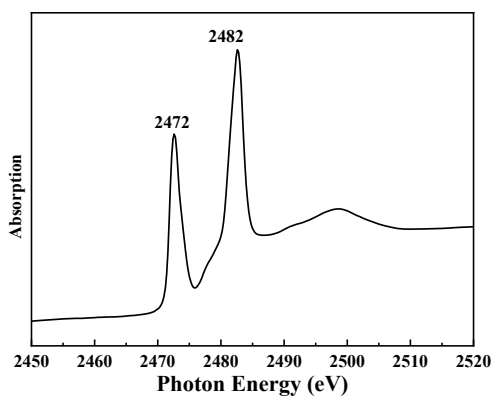

Fig.S8 Sulfur K-edge XANES spectra of spent Na/BAC-8 catalyst

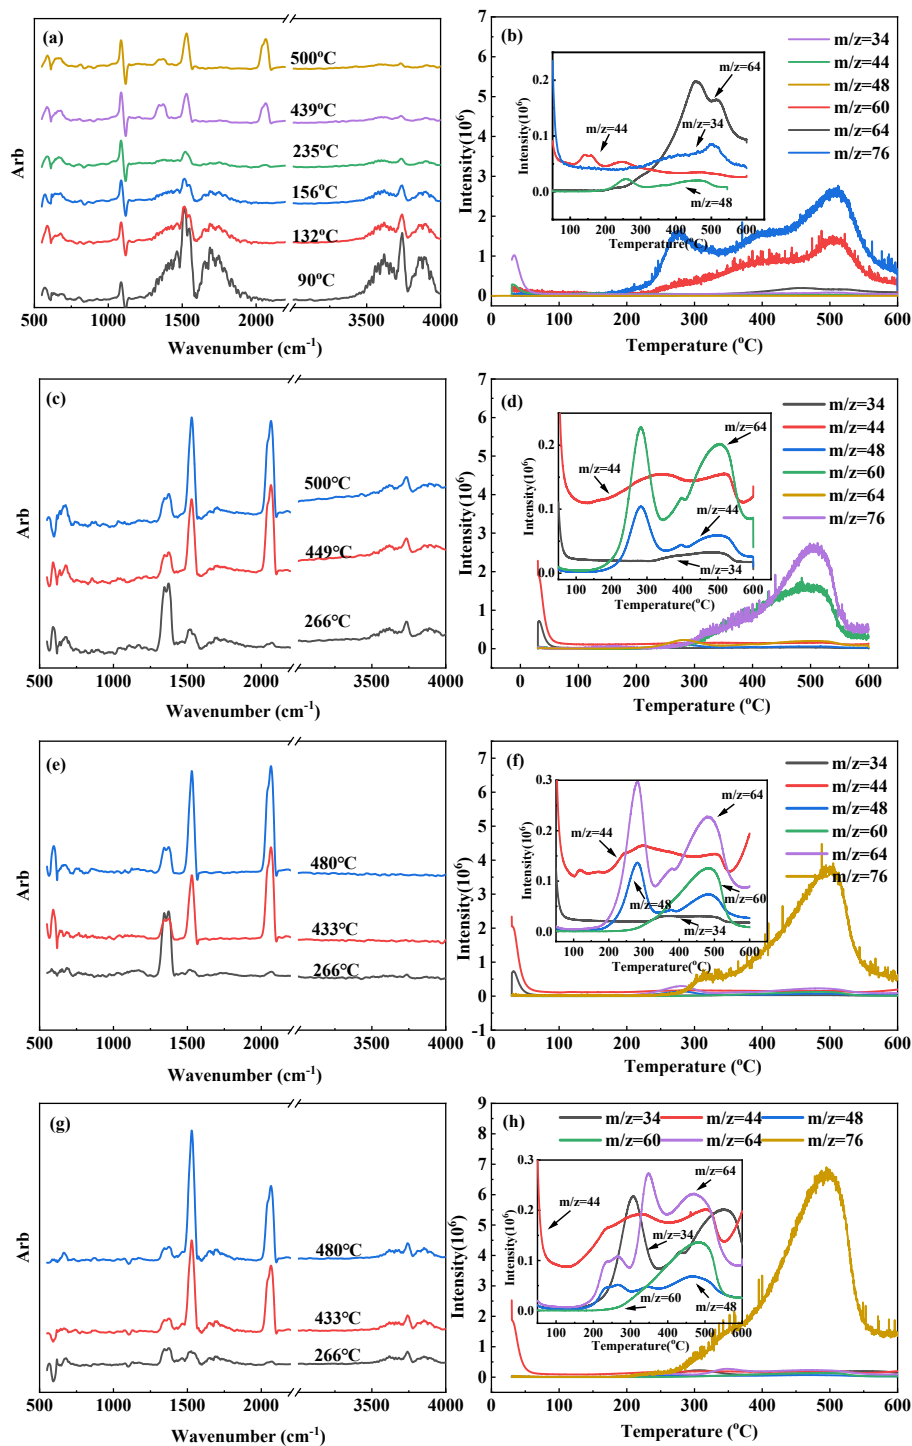

Fig.S9 IR spectra at different temperature (a) Na/BAC-2, (c) Na/BAC-4, (e) Na/BAC-6, (g) Na/BAC-8 and MS profiles (b) Na/BAC-2, (d) Na/BAC-4, (f) Na/BAC-6, (h) Na/BAC-8 of spent Na/BAC catalysts

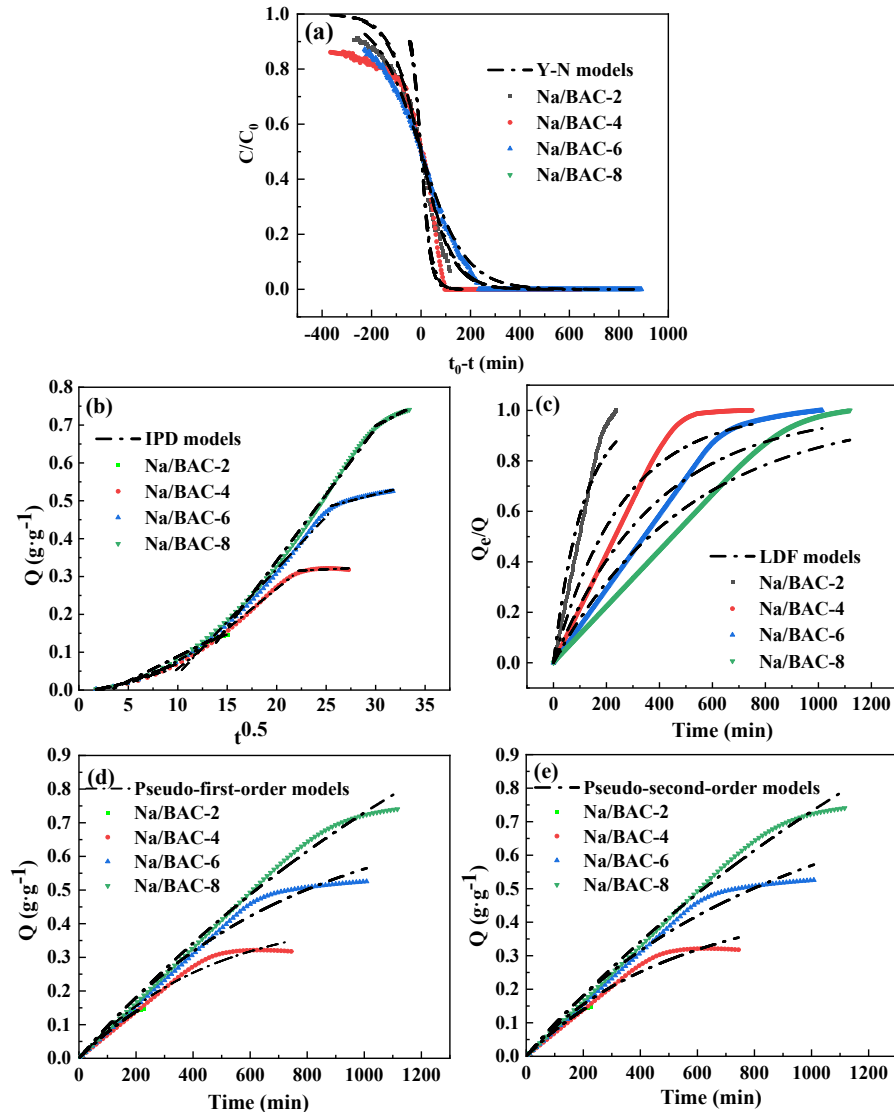

Fig.S10 Y-N models (a), IPD models (b), LDF models (c), PFO models (d) and PSO models (e) fitting of Na/BAC catalysts.

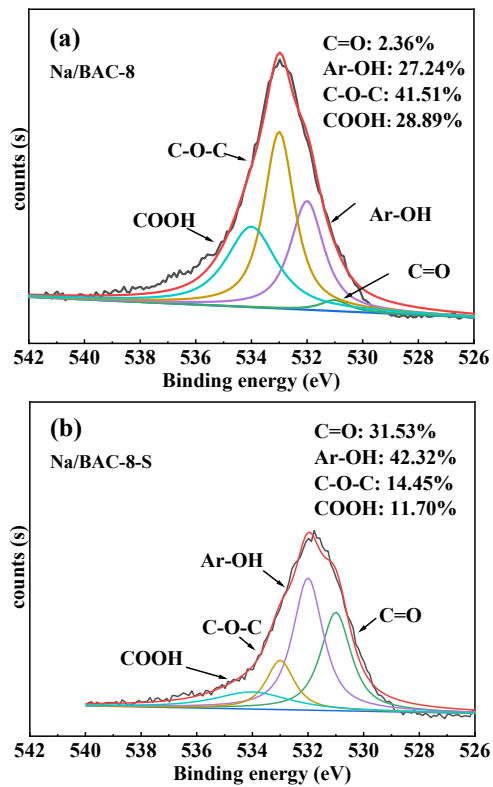

Fig.S11 The O1s XPS spectra of Na/BAC-8 (a) and Na/BAC-8-S (b)

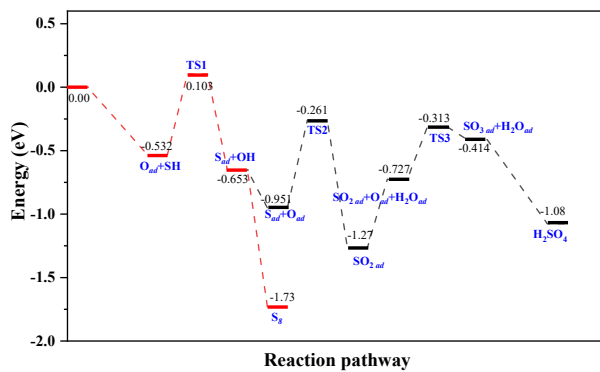

Fig. S12 Energy profile of H<sub>2</sub>S catalytic oxidation-adsorption at room temperature

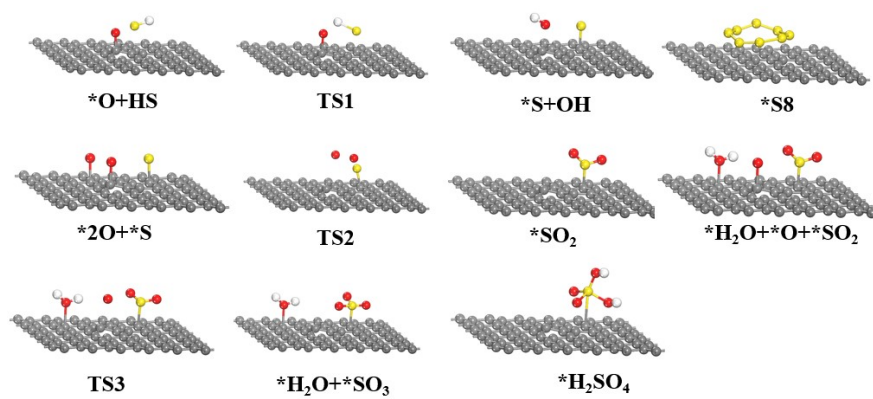

Fig.S13 The optimized geometries of the intermediates and transition states
